# Supplementary material for: Redefining the role of Ca2+-permeable channels in photoreceptor degeneration using diltiazem
Source: PubMed Central journal article supplement (PMC8748460; doi:10.1038/s41419-021-04482-1), 2022-01-10
Supplement: 41419_2021_4482_MOESM3_ESM.pdf [file 41419_2021_4482_MOESM3_ESM.pdf]

1

## Supplementary Figures and Tables with Legends

2 Das *et al.*: Redefining the role of Ca<sup>2+</sup>-permeable channels in photoreceptor  
3 degeneration using diltiazem.

4

5 **Supplementary Figure S1**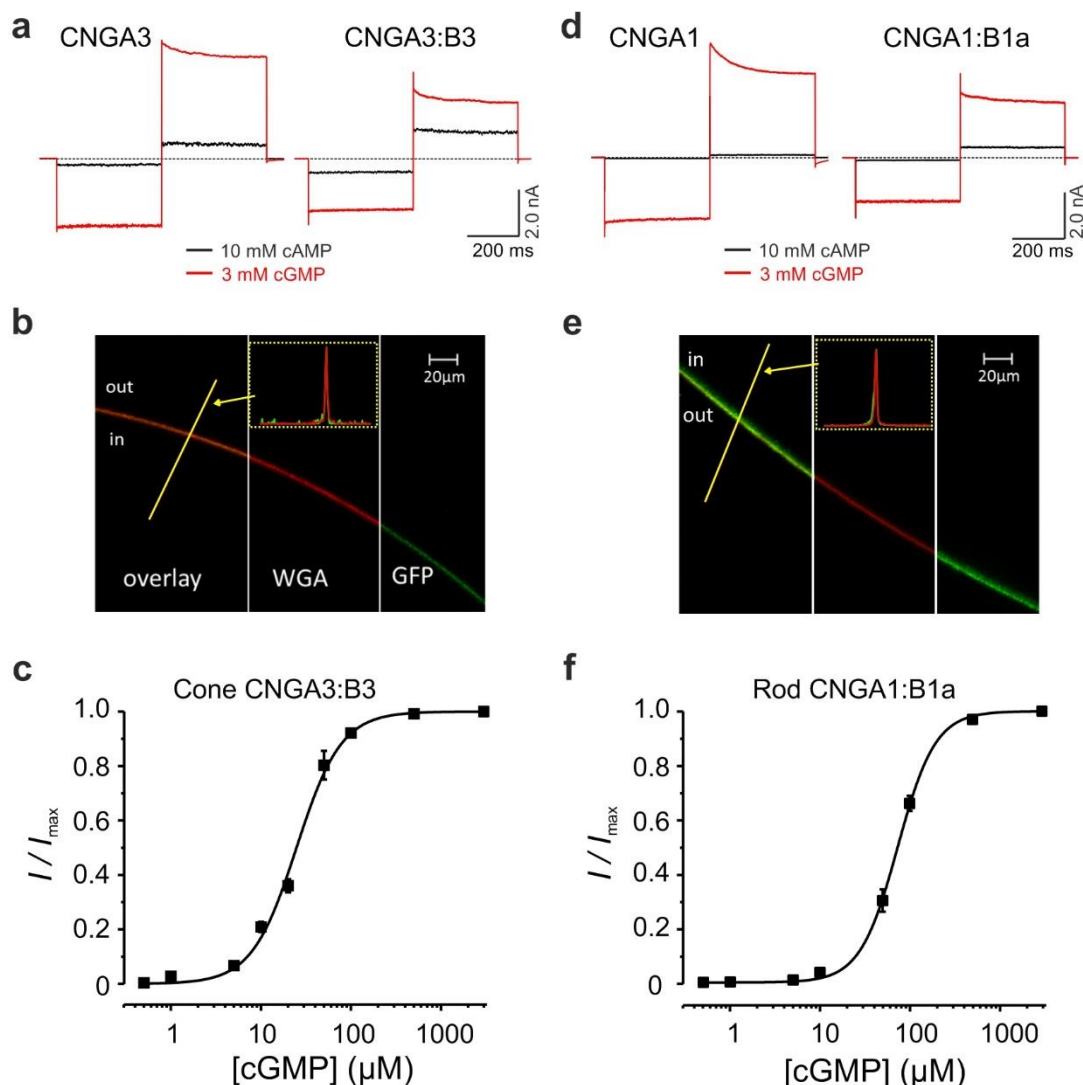

**Figure S1: Functional properties of photoreceptor heterotetrameric CNGCs expressed in *Xenopus laevis* oocytes.** Representative macroscopic cone (**a**) and rod (**d**) CNGC-current traces from inside-out membrane patches in the presence of 3 mM cGMP (red) and 10 mM cAMP (black). The current traces were elicited by voltage steps from a holding potential of 0 mV to -100, +100 and 0 mV. Leak currents in the absence of cGMP were subtracted for all recordings. For CNGA3 channels the ratio  $I_{\text{cAMP}}/I_{\text{cGMP}}$  was  $0.15 \pm 0.01$  ( $n=8$ ). CNGB3-subunit incorporation into the CNGA3:B3 channel leads to a significant increase in the cAMP efficacy ( $I_{\text{cAMP}}/I_{\text{cGMP}}=0.42 \pm 0.03$ ,  $n=6$ ). Similarly, for CNGA1 channels the ratio  $I_{\text{cAMP}}/I_{\text{cGMP}}$  was  $0.019 \pm 0.005$  ( $n=12$ ), whereas for heterotetrameric CNGA1:B1a channels the ratio was  $0.16 \pm 0.02$  ( $n=6$ ). (**b**, **e**) Representative measurements showing confocal images of oocyte membrane expressing heterotetrameric CNGA3:B3-GFP (**b**) and CNGA1:B1a-GFP (**e**) channels (green fluorescence signal). The oocyte plasma membrane was labelled with Alexa Fluor™ 633 WGA (red fluorescence signal). The small insets show fluorescence profiles along the yellow line, perpendicular to the membrane and confirm the

colocalization of the labelled channels with the oocyte membrane. For each channel isoform we tested more than 10 oocytes from at least two different oocyte batches. **(c, f)** cGMP-dependent concentration-activation relationships for cone CNGA3:B3 **(c)** and rod CNGA1:B1a **(f)** channels obtained at -35 mV. The currents triggered by subsaturating ligand concentrations were normalized with respect to the maximal current at 3 mM cGMP. The experimental data points, each representing the mean of 5 to 10 measurements, were fitted with Eq. (1) (see also Table S1).

---

6

7

8 **Supplementary Figure S2**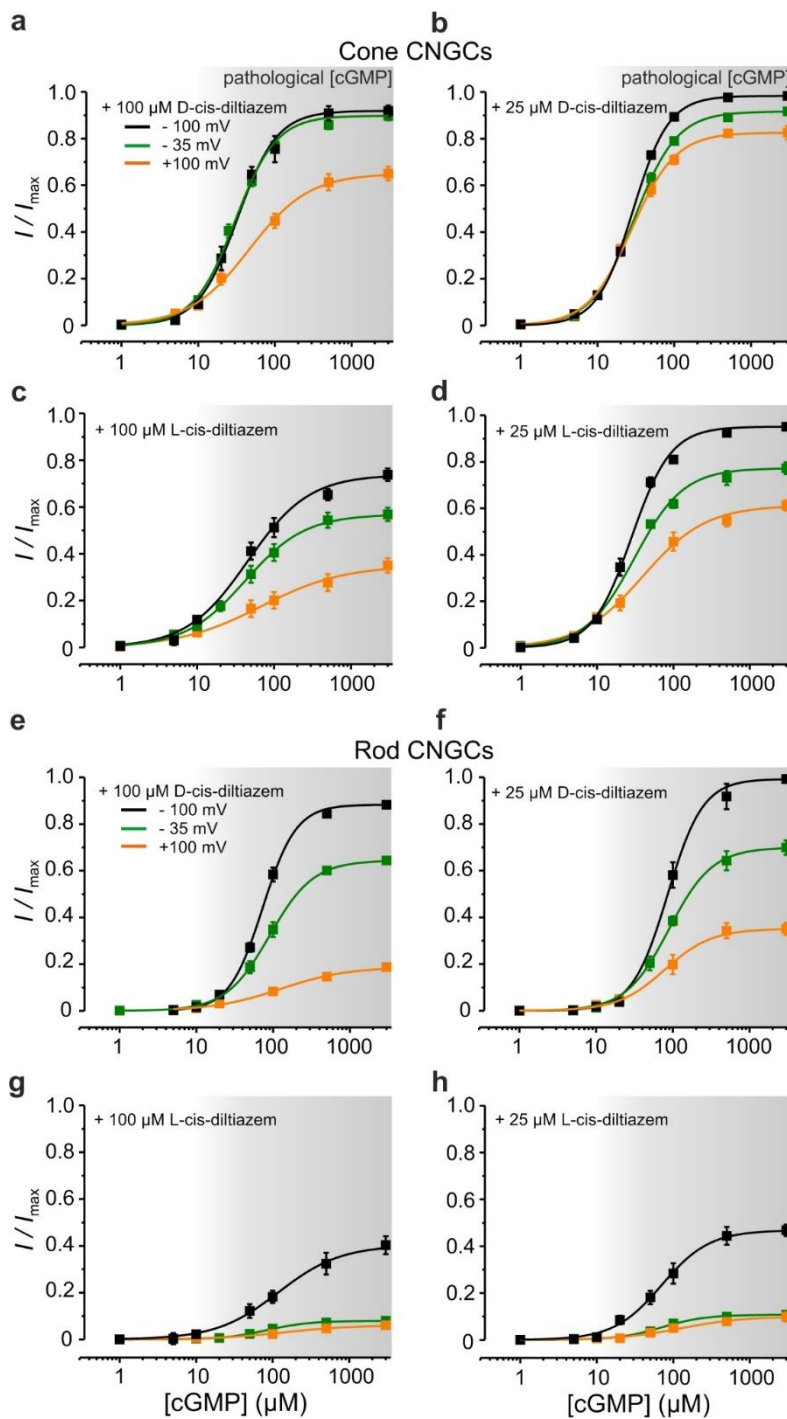

**Figure S2: Voltage dependence of D- and L-cis-diltiazem-induced inhibition of photoreceptor CNGCs.** cGMP-dependent concentration-activation relationships for cone (a-d) and rod (e-h) CNGCs in the presence of 100  $\mu\text{M}$  (left) and 25  $\mu\text{M}$  (right) D- and L-cis-diltiazem, respectively, measured at: -100 mV (black symbols), -35 mV (green symbols) and +100 mV (orange symbols). The current amplitudes were normalized with respect to the saturating currents measured in the absence of diltiazem at each individual voltage. The experimental data points were fitted with the Hill equation (Eq. 1). All parameters obtained from the fits are included in Table S1.

10

11

**Supplementary Figure S3**

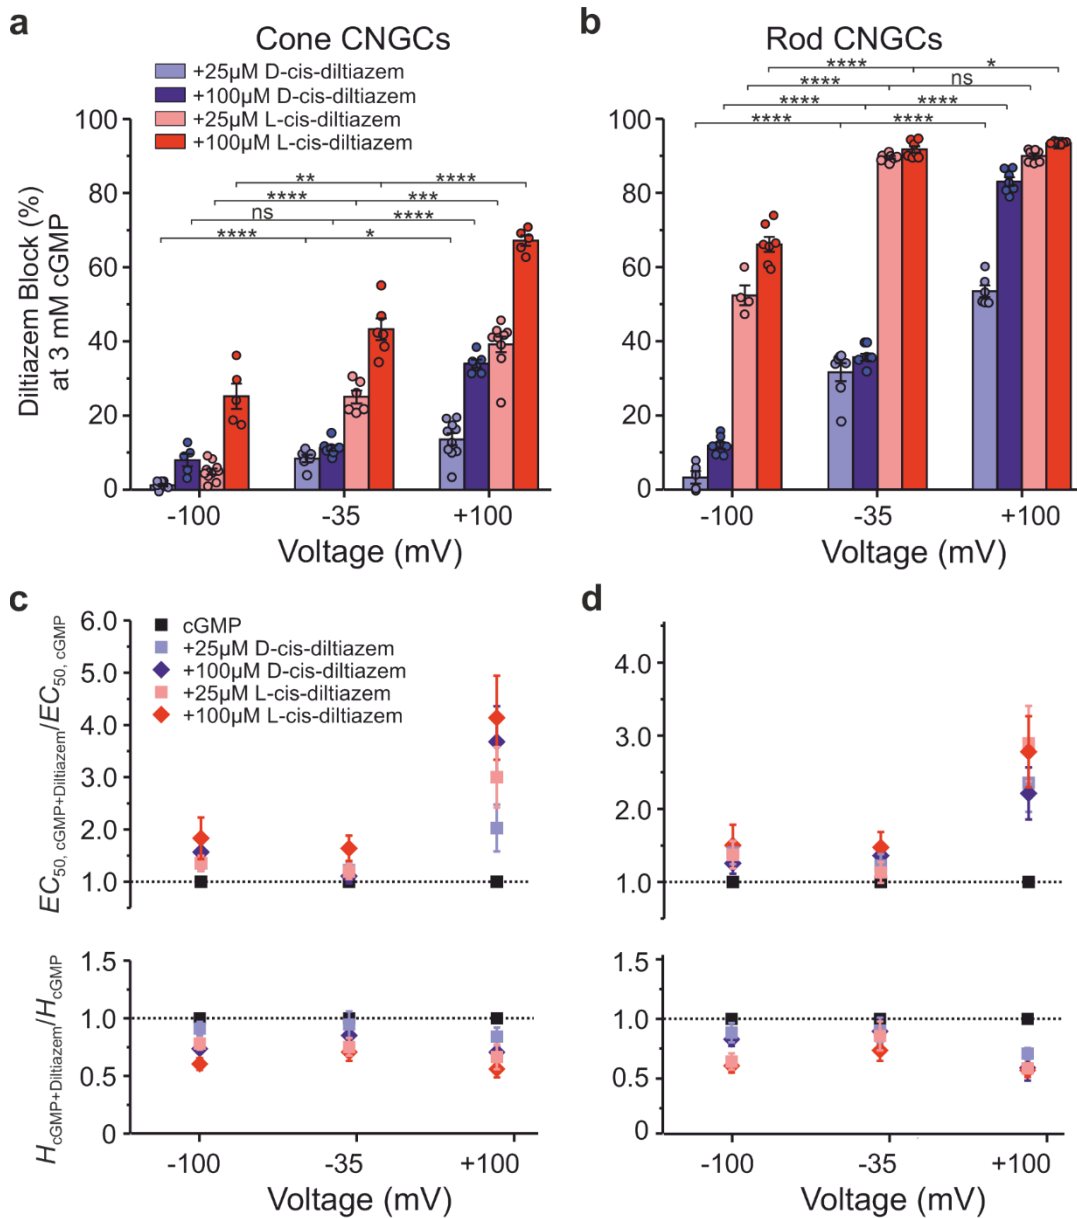

**Figure S3: Differential effect of D-cis- and L-cis-diltiazem on CNGC activity and apparent affinity.** (a, b) D- and L-cis-diltiazem - block of cone and rod CNGC activity triggered by saturating cGMP at three different voltages. The amount of diltiazem block was calculated using Eq. 2. (c, d) Effect of D- and L-cis-diltiazem on the channel's apparent affinity. Shown are the  $EC_{50,cGMP+Diltiazem}/EC_{50,cGMP}$ - and  $H_{cGMP+Diltiazem}/H_{cGMP}$ -ratios in the presence of 25  $\mu$ M or 100  $\mu$ M D- or L-cis-Diltiazem at -100 mV, -35 mV and +100 mV. The  $EC_{50}$ - and  $H$ -values were obtained from the concentration-activation relationships shown in Figs. 1 and S2 (see also Table S1). For statistical analysis see Table S3.

12

13

14 **Supplementary Figure S4**

15

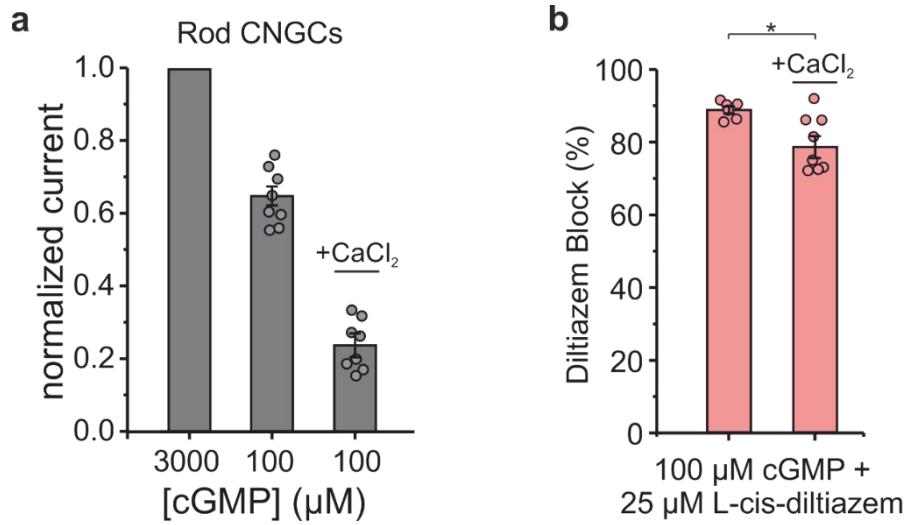

**Figure S4: Effect of Ca<sup>2+</sup> on the blocking effect of L-cis-diltiazem on rod CNGCs.** (a) The diagram shows normalized rod CNGCs current triggered by 100  $\mu\text{M}$  cGMP, in the absence and in the presence of 1 mM CaCl<sub>2</sub> in the extracellular solution. The current at 100  $\mu\text{M}$  was normalized with respect to the current in the presence of 3 mM cGMP, under the respective CaCl<sub>2</sub>-conditions (n=9). The channel response to cGMP is much weaker in the presence of Ca<sup>2+</sup> ( $I_{\text{cGMP}+\text{CaCl}_2}/I_{\text{max}} = 0.233 \pm 0.03$ ) as it is in its absence ( $I/I_{\text{max}} = 0.65 \pm 0.026$ ). (b) L-cis-diltiazem - block of rod CNGC activity triggered by 100  $\mu\text{M}$  cGMP in either the presence or absence of Ca<sup>2+</sup>. The amount of diltiazem block was calculated using Eq. 2. The two-tailed unpaired Student *t*-test was used for the statistical analysis:  $p = 0.034$ .

16

17

18 **Supplementary Figure S5**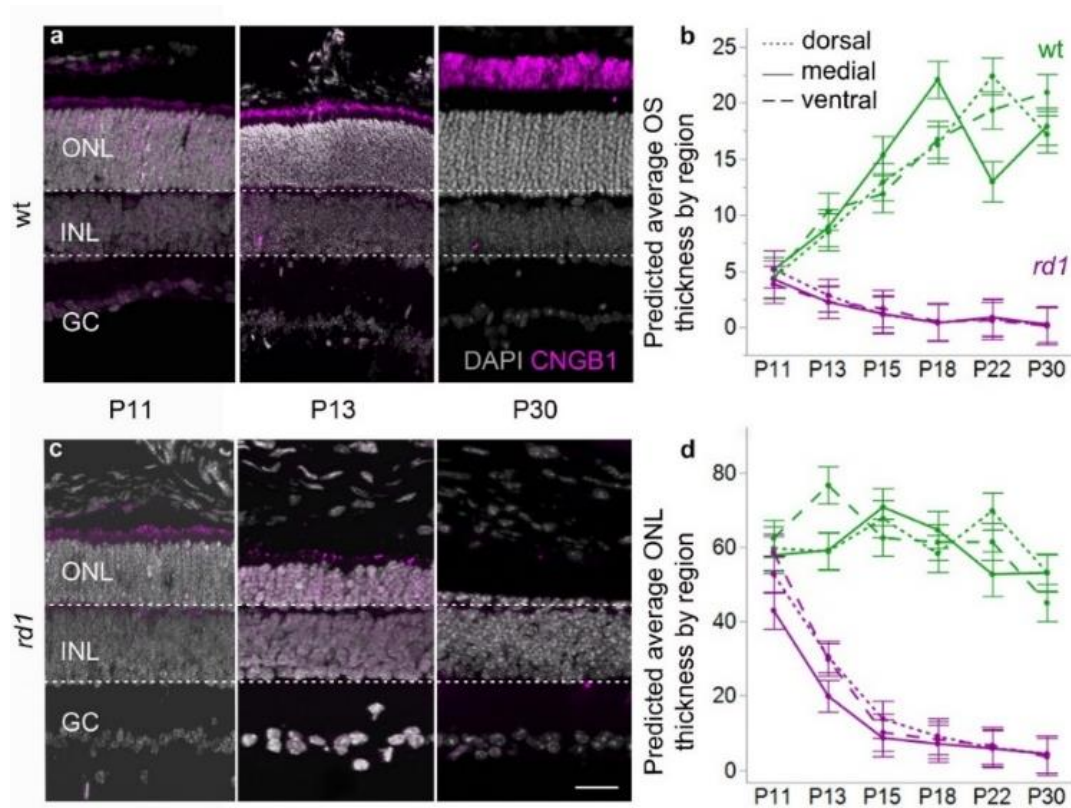

**Figure S5: ONL thickness and CNGC expression during *rd1* retinal degeneration.** Immunostaining for CNGB1a (magenta) was performed at different post-natal (P) days in wild-type (wt) and *rd1* retina (**a,c**). The nuclear counterstain (DAPI, grey) indicates outer nuclear layer (ONL), inner nuclear layer (INL), and ganglion cell layer (GC). Dotted, solid and dashed lines in the graph represent dorsal, medial, and ventral mouse retina respectively (**b,d**). (**a**) In wt retina, CNGB1a immunostaining labelled the photoreceptor outer segments, which grew longer from P11 to P30. (**c**) In *rd1* retina, CNGB1a positive outer segments were visible at P11 and P13 but essentially disappeared by P30. (**d**) The thickness of the ONL in wt retina (green) remained approx. constant between P11 and P30, while *rd1* (magenta) ONL size rapidly diminished after P11. (**b**) Outer segments in wt retina grew longer from P11 to P24 until reaching a plateau at a length of approx. 20  $\mu\text{m}$ . In contrast, *rd1* outer segments, while still comparable to wt at P11, had decreased in length to nearly 0  $\mu\text{m}$  by P24. Images and quantification were obtained from retinal sections from 4-5 different animals per time-point and genotype. Scale bar = 30  $\mu\text{m}$ .

19

20



## Supplementary Figure S6

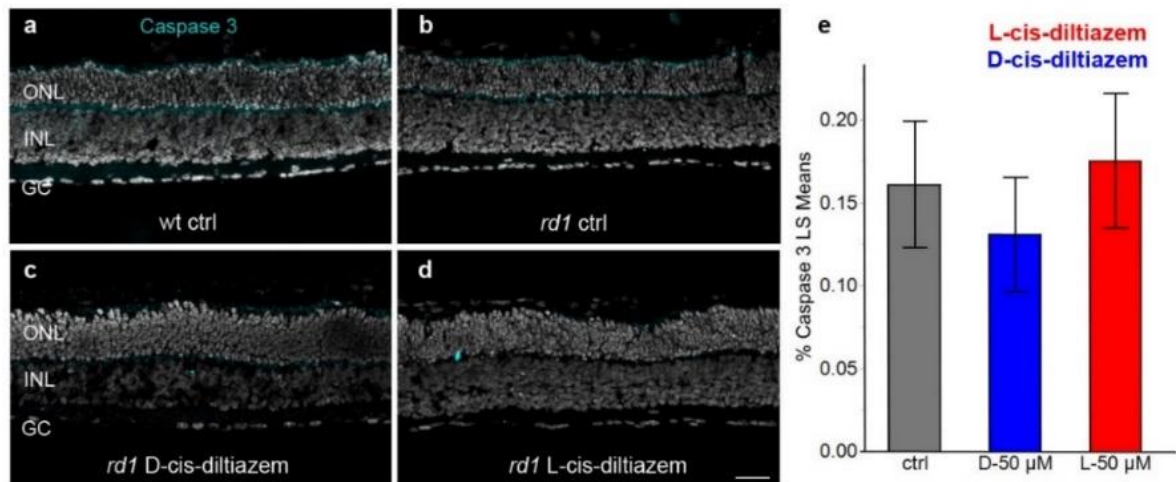

**Figure S6: Absence of apoptotic marker during photoreceptor degeneration.** Immunostaining for cleaved, activated caspase-3 (turquoise) was performed on *rd1* retinal sections treated with D- and L-cis-diltiazem (50 μM). DAPI (grey) was used as nuclear counterstain. While caspase-3 immunoreactivity was occasionally found in both outer and inner nuclear layer (ONL, INL), the percentage of caspase-3 positive cells was far lower than the numbers of dying cells (*cf.* Fig. 6). Scale bar = 50 μm.

21

## Supplementary Figure S7

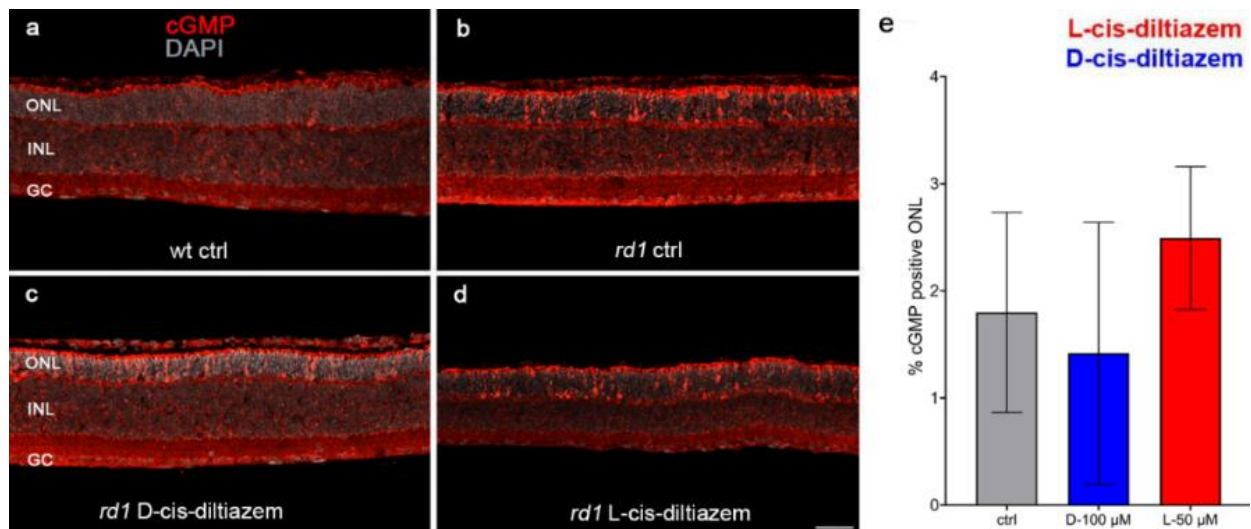

**Figure S7: Accumulation of cGMP with/wo diltiazem treatment.** Immunostaining for cGMP (red) was performed on wt and *rd1* retinal sections treated with D- and L-cis-diltiazem (50 μM). DAPI (grey) was used as nuclear counterstain. cGMP immunoreactivity was detected in photoreceptor segments and cell bodies in the outer nuclear layer (ONL). No significant change in the percentage of cGMP positive cells was observed neither with D-cis- nor with L-cis-diltiazem. Scale bar = 50 μm.

22 **Supplementary Table S1**

| mV   | cone CNGC         |                   |    |                                 |                    |   |                                 |                    |   |                                |                    |    |                                 |                    |   |
|------|-------------------|-------------------|----|---------------------------------|--------------------|---|---------------------------------|--------------------|---|--------------------------------|--------------------|----|---------------------------------|--------------------|---|
|      | cGMP ( $\mu$ M)   |                   |    | + 25 $\mu$ M<br>D-cis-diltiazem |                    |   | +100 $\mu$ M<br>D-cis-diltiazem |                    |   | +25 $\mu$ M<br>L-cis-diltiazem |                    |    | +100 $\mu$ M<br>L-cis-diltiazem |                    |   |
|      | $EC_{50}$         | $H$               | n  | $EC_{50}$                       | $H$                | n | $EC_{50}$                       | $H$                | n | $EC_{50}$                      | $H$                | n  | $EC_{50}$                       | $H$                | n |
| -35  | 26.0<br>$\pm 2.9$ | 1.81<br>$\pm 0.1$ | 7  | 31.7<br>$\pm 1.6$               | 1.71<br>$\pm 0.1$  | 6 | 28.8<br>$\pm 1.4$               | 1.54<br>$\pm 0.1$  | 7 | 31.1<br>$\pm 1.1$              | 1.36<br>$\pm 0.09$ | 5  | 42.6<br>$\pm 4.0$               | 1.28<br>$\pm 0.1$  | 6 |
| -100 | 20.7<br>$\pm 2.1$ | 2.12<br>$\pm 0.1$ | 9  | 28.0<br>$\pm 0.6$               | 1.93<br>$\pm 0.08$ | 8 | 32.5<br>$\pm 3.0$               | 1.56<br>$\pm 0.1$  | 5 | 28.0<br>$\pm 1.2$              | 1.65<br>$\pm 0.07$ | 10 | 47.8<br>$\pm 6.6$               | 1.13<br>$\pm 0.09$ | 5 |
| +100 | 13.5<br>$\pm 3.2$ | 1.70<br>$\pm 0.1$ | 5  | 27.5<br>$\pm 1.7$               | 1.43<br>$\pm 0.1$  | 7 | 49.9<br>$\pm 6.0$               | 1.20<br>$\pm 0.05$ | 5 | 40.6<br>$\pm 4.9$              | 1.13<br>$\pm 0.1$  | 9  | 56.1<br>$\pm 9.9$               | 0.95<br>$\pm 0.1$  | 5 |
|      | rod CNGC          |                   |    |                                 |                    |   |                                 |                    |   |                                |                    |    |                                 |                    |   |
| -35  | 70.1<br>$\pm 5.3$ | 1.74<br>$\pm 0.1$ | 7  | 85.7<br>$\pm 8.8$               | 1.71<br>$\pm 0.1$  | 7 | 95.4<br>$\pm 9.2$               | 1.68<br>$\pm 0.1$  | 6 | 79.2<br>$\pm 8.1$              | 1.49<br>$\pm 0.2$  | 5  | 103.2<br>$\pm 12.4$             | 1.28<br>$\pm 0.1$  | 6 |
| -100 | 61.5<br>$\pm 5.3$ | 1.98<br>$\pm 0.1$ | 10 | 86.3<br>$\pm 6.4$               | 1.93<br>$\pm 0.08$ | 5 | 77.2<br>$\pm 5.5$               | 1.84<br>$\pm 0.08$ | 7 | 84.3<br>$\pm 8.8$              | 1.27<br>$\pm 0.1$  | 5  | 92.4<br>$\pm 15.2$              | 1.20<br>$\pm 0.1$  | 6 |
| +100 | 46.5<br>$\pm 6.5$ | 2.02<br>0.07      | 10 | 109.5<br>$\pm 10.0$             | 1.43<br>$\pm 0.1$  | 6 | 102.8<br>$\pm 7.9$              | 1.19<br>$\pm 0.2$  | 6 | 134.5<br>$\pm 14.8$            | 1.18<br>$\pm 0.06$ | 5  | 129.3<br>$\pm 13.3$             | 1.15<br>$\pm 0.1$  | 6 |

23  
24 **Table S1: Effect of D- and L-cis-diltiazem on the apparent affinity of rod and cone**  
25 **CNGCs.** The  $EC_{50}$ -values and Hill coefficients ( $H$ ,  $\pm$ SEM) were obtained from the fit of  
26 the respective concentrations-activation relationships (n = number of experiments). Two-  
27 tailed unpaired Student  $t$ -test was used to compare the  $EC_{50}$ - and  $H$ -values in the  
28 presence of diltiazem with the ones obtained in its absence.

29  
30  
31  
32  
33  
34

35 **Supplementary Table S2**

| mV   | Diltiazem Block (%) of cone CNGC at 3 mM cGMP       |                                  |            |                                 |                                  |            |
|------|-----------------------------------------------------|----------------------------------|------------|---------------------------------|----------------------------------|------------|
|      | + 25 $\mu$ M<br>D-cis-diltiazem                     | + 100 $\mu$ M<br>D-cis-diltiazem | $p$ -value | + 25 $\mu$ M<br>L-cis-diltiazem | + 100 $\mu$ M<br>L-cis-diltiazem | $p$ -value |
| -35  | 8.37 $\pm$ 0.97                                     | 11.2 $\pm$ 1.1                   | 0.0378     | 25.0 $\pm$ 1.6                  | 43.2 $\pm$ 2.8                   | 0.0002     |
| -100 | 1.20 $\pm$ 0.3                                      | 8.02 $\pm$ 1.7                   | 0.0001     | 4.9 $\pm$ 0.8                   | 25.3 $\pm$ 3.4                   | <0.0001    |
| +100 | 13.5 $\pm$ 1.6                                      | 34.0 $\pm$ 1.1                   | <0.0001    | 39.2 $\pm$ 2.2                  | 67.2 $\pm$ 1.4                   | <0.0001    |
|      | Diltiazem Block (%) of rod CNGC at 3 mM cGMP        |                                  |            |                                 |                                  |            |
| -35  | 31.5 $\pm$ 2.3                                      | 35.6 $\pm$ 0.9                   | ns         | 89.2 $\pm$ 0.37                 | 91.5 $\pm$ 0.8                   | 0.0270     |
| -100 | 3.26 $\pm$ 1.7                                      | 11.9 $\pm$ 0.9                   | 0.0006     | 52.4 $\pm$ 2.7                  | 66.2 $\pm$ 2.0                   | 0.0025     |
| +100 | 53.5 $\pm$ 1.6                                      | 83.1 $\pm$ 1.2                   | <0.0001    | 90.0 $\pm$ 0.65                 | 93.5 $\pm$ 1.4                   | 0.0004     |
|      | Diltiazem Block (%) of rod CNGC at 100 $\mu$ M cGMP |                                  |            |                                 |                                  |            |
| -35  | 40.4 $\pm$ 3.4                                      | 46.1 $\pm$ 5.3                   | ns         | 88.4 $\pm$ 1.1                  | 93.5 $\pm$ 1.1                   | 0.0021     |

36  
37  
38  
39  
40  
41  
42  
43  
44 **Table S2: Effect of D- and L-cis-diltiazem on the current amplitude of rod and cone**  
45 **CNGCs.** The amount of block was determined by comparing the CNGC currents in the  
46 presence and in the absence of either D- or L-cis-diltiazem ( $\pm$ SEM, n=5-10) and was  
47 calculated using Eq. 2. The comparison between 25 and 100  $\mu$ M of D- and L-cis-  
48 diltiazem, respectively, was performed using the two-tailed unpaired Student's  $t$ -test.

49  
50



51

52

53 **Supplementary Table S3**

| mV   | cone CNGC:                           |          | <i>p</i> -value                       |          |                                      |          |                                       |          |
|------|--------------------------------------|----------|---------------------------------------|----------|--------------------------------------|----------|---------------------------------------|----------|
|      | cGMP + 25 $\mu$ M<br>D-cis-diltiazem |          | cGMP + 100 $\mu$ M<br>D-cis-diltiazem |          | cGMP + 25 $\mu$ M<br>L-cis-diltiazem |          | cGMP + 100 $\mu$ M<br>L-cis-diltiazem |          |
|      | <i>EC</i> <sub>50</sub>              | <i>H</i> | <i>EC</i> <sub>50</sub>               | <i>H</i> | <i>EC</i> <sub>50</sub>              | <i>H</i> | <i>EC</i> <sub>50</sub>               | <i>H</i> |
| -35  | 0.04242                              | ns       | ns                                    | ns       | ns                                   | 0.00677  | 0.00277                               | 0.00295  |
| -100 | 0.00042                              | ns       | 0.000527                              | 0.00934  | 0.000291                             | 0.00121  | 0.000153                              | <0.0001  |
| +100 | 0.000151                             | ns       | 0.00103                               | 0.01494  | 0.00222                              | ns       | 0.01297                               | 0.00636  |
|      | rod CNGC:                            |          | <i>p</i> -value                       |          |                                      |          |                                       |          |
| -35  | ns                                   | ns       | 0.02422                               | ns       | ns                                   | ns       | 0.02159                               | 0.02111  |
| -100 | 0.00534                              | ns       | 0.04734                               | ns       | 0.01729                              | 0.00055  | ns                                    | 0.00012  |
| +100 | <0.0001                              | <0.0001  | <0.0001                               | <0.0001  | <0.0001                              | <0.0001  | <0.0001                               | <0.0001  |

54

55 **Table S3: Statistical analysis of the effect of diltiazem on CNGC *EC*<sub>50</sub>- and *H*-values**  
 56 **at different voltages.** The respective parameters and number of experiments are listed  
 57 in Table S1. The *EC*<sub>50</sub> and *H*-values in the presence of cGMP only were compared with  
 58 the respective values in presence of cGMP and diltiazem.

59

60

61

62

63 **Supplementary Table S4**

|                                  | cone CNGC         |                 |                     |                 |                     |                 |
|----------------------------------|-------------------|-----------------|---------------------|-----------------|---------------------|-----------------|
|                                  | $\tau_{act}$ (ms) | <i>p</i> -value | $\tau_{deact}$ (ms) | <i>p</i> -value | $\tau_{block}$ (ms) | <i>p</i> -value |
| cGMP ( $\mu$ M)                  | 6.8 $\pm$ 2.3     | -               | 48.2 $\pm$ 17.0     | -               |                     | -               |
| + 100 $\mu$ M<br>D-cis-diltiazem | 7.5 $\pm$ 2.6     | ns              | 103.6 $\pm$ 39.1    | 0.0009          | 154.4 $\pm$ 53.4    | ns              |
| + 100 $\mu$ M<br>L-cis-diltiazem | 7.9 $\pm$ 2.8     | ns              | 94.7 $\pm$ 36.8     | 0.0032          | 120.4 $\pm$ 38.5    |                 |
|                                  | rod CNGC          |                 |                     |                 |                     |                 |
| cGMP ( $\mu$ M)                  | 7.6 $\pm$ 2.1     | -               | 52.1 $\pm$ 18.2     | -               |                     | -               |
| + 100 $\mu$ M<br>D-cis-diltiazem | 9.8 $\pm$ 2.6     | ns              | 81.2 $\pm$ 30.5     | 0.0315          | 139.7 $\pm$ 60.2    | ns              |
| + 100 $\mu$ M<br>L-cis-diltiazem | 12.2 $\pm$ 4.1    | ns              | 123.4 $\pm$ 46.1    | 0.0010          | 150.0 $\pm$ 56.7    |                 |

64

65 **Table S4: Effect of D- and L-cis-diltiazem on the gating kinetics of cone and rod**  
 66 **CNGCs.** The effect of diltiazem on activation- and deactivation- time constants ( $\tau_{act}$ ,  $\tau_{deact}$   
 67 and  $\tau_{block}$ ) in the presence of 3 mM cGMP (ms,  $\pm$ SEM, n=5-9). Two-tailed unpaired  
 68 Student *t*-test was used for the comparison between time constants obtained in the  
 69 presence and in the absence of diltiazem.

70

71

72

73 **Supplementary Table S5**

| Component                                            | p-value | Effect-Size | ES-Lower-CI | ES-Upper-CI |
|------------------------------------------------------|---------|-------------|-------------|-------------|
| Model (all components)                               |         | 0.368       | 0.319       | 0.422       |
| AUC (control)                                        | <0.0001 | 0.195       | 0.147       | 0.247       |
| Treatment (drug)                                     | 0.00123 | 0.05        | 0.023       | 0.085       |
| Treatment (concentration)                            | 0.3416  | 0.039       | 0.016       | 0.072       |
| AUC (control) x treatment (drug)                     | 0.119   | 0.003       | 0           | 0.017       |
| AUC (control) x treatment (conc.)                    | 0.171   | 0.002       | 0           | 0.015       |
| AUC (control) x treatment (drug) x treatment (conc.) | <0.0001 | 0.021       | 0.005       | 0.047       |

74

75 **Table S5: Effect of D- and L-cis-diltiazem on light-evoked Ca<sup>2+</sup> signals in wt cone**  
 76 **photoreceptors.** The linear modelling identified the variables that significantly predict  
 77 the data. The area-under-the-curve (AUC) in the control condition was significant and  
 78 had the largest effect size, with semi-partial R-squared (SPRS) equal to 0.195  
 79 ( $p < 0.0001$ ). The drug treatment and the drug concentration were both significant. There  
 80 was also a statistically significant interaction between the AUC in the control condition,  
 81 the drug treatment, and the drug concentration. Since their confidence intervals overlap,  
 82 we cannot state which of these model components had the greatest effect size. There  
 83 was neither a significant interaction between the AUC in the control condition and the  
 84 drug treatment, nor between the AUC in the control condition and the drug concentration.  
 85 (*cf.* Fig. 4).

86

87

88

89

90

91 **Supplementary Table S6**

| Fixed effect                             | OS length<br>n = 109, R <sup>2</sup> <sub>adj.</sub> = 0.96 |          | ONL thickness<br>n = 109, R <sup>2</sup> <sub>adj.</sub> = 0.93 |          |
|------------------------------------------|-------------------------------------------------------------|----------|-----------------------------------------------------------------|----------|
|                                          | F-statistic                                                 | p-value  | F-statistic                                                     | p-value  |
| genotype                                 | $F(1, 25.25) = 0.0078$                                      | 0.9304   | $F(1, 25.99) = 2.6450$                                          | 0.1159   |
| Time-point                               | $F(5, 24.7) = 4.4213$                                       | 0.0052   | $F(5, 24.77) = 15.1946$                                         | < 0.0001 |
| Retinal position                         | $F(2, 48.36) = 0.2982$                                      | 0.7435   | $F(2, 49.39) = 2.9380$                                          | 0.0623   |
| genotype x time-point                    | $F(5, 24.7) = 13.2699$                                      | < 0.0001 | $F(5, 24.77) = 12.0885$                                         | < 0.0001 |
| genotype x retinal position              | $F(2, 48.36) = 0.3245$                                      | 0.7245   | $F(2, 49.39) = 0.9156$                                          | 0.4070   |
| timepoint x retinal position             | $F(10, 47.94) = 3.8401$                                     | 0.0007   | $F(10, 48.41) = 2.0258$                                         | 0.0508   |
| genotype x time-point x retinal position | $F(10, 47.94) = 4.2248$                                     | 0.0003   | $F(10, 48.41) = 1.3344$                                         | 0.2397   |

92

93 **Table S6: Analysis of the variability of OS length and ONL thickness in rd1 and wt.**  
 94 Results of the linear mixed-effects models with the dependent variables OS length and  
 95 ONL thickness. The models' residuals followed a normal distribution, while the Brown-  
 96 Forsythe test indicated a violation of the assumption of homoscedasticity for both models.  
 97 However, linear mixed-effects models estimates have been shown to be robust against  
 98 such violations (81).

99

100

101 **Supplementary Table S7**

| Dependent variable            | Genotype                                           | Fixed effect               | Normality of residuals | Homo-scedasticity | F-statistic             | p-value  |
|-------------------------------|----------------------------------------------------|----------------------------|------------------------|-------------------|-------------------------|----------|
| <b>TUNEL</b>                  | wt (35)<br>$R^2_{adj.} = .80$<br>n = 336           | Concentration <sup>1</sup> | Yes                    | No                | $F(3, 17.92) = 20.7656$ | <0.0001  |
|                               |                                                    | Treatment                  |                        |                   | $F(1, 303.74) = 0.171$  | 0.6795   |
|                               |                                                    | Concentration x Treatment  |                        |                   | $F(3, 22.8) = 29.6038$  | <0.0001  |
|                               | rd1 (36)<br>$R^2_{adj.} = .88$<br>n = 331          | Concentration <sup>1</sup> | Yes                    | No                | $F(3, 24.82) = 37.8570$ | < 0.0001 |
|                               |                                                    | Treatment                  |                        |                   | $F(1, 306.63) = 0.0787$ | 0.7792   |
|                               |                                                    | Concentration x Treatment  |                        |                   | $F(3, 27.75) = 31.0649$ | <0.0001  |
|                               | rd10 (10)<br>$R^2_{adj.} = .84$<br>n = 112         | Concentration <sup>4</sup> | Yes                    | No                | $F(1, 8.11) = 25.9134$  | <0.0009  |
|                               |                                                    | Treatment                  |                        |                   | $F(1, 100.96) = 0.0026$ | 0.9598   |
|                               |                                                    | Concentration x Treatment  |                        |                   | $F(1, 10.43) = 23.5461$ | <0.0006  |
| <b>Calpain activity</b>       | wt (21) & rd1 (30)<br>$R^2_{adj.} = .74$<br>n = 51 | Genotype                   | Yes                    | No                | $F(1, 45) = 29.1249$    | <0.0001  |
|                               |                                                    | Treatment                  |                        |                   | $F(2, 45) = 56.1128$    | <0.0001  |
|                               |                                                    | Genotype x Treatment       |                        |                   | $F(2, 45) = 2.5937$     | 0.0859   |
| <b>Calpain- 2</b>             | wt (9) & rd1 (9)<br>$R^2_{adj.} = .83$<br>n = 117  | Genotype                   | Yes                    | No                | $F(1, 12.14) = 9.0927$  | 0.0106   |
|                               |                                                    | Treatment                  |                        |                   | $F(2, 12.14) = 20.2775$ | 0.0001   |
|                               |                                                    | Genotype x Treatment       |                        |                   | $F(2, 12.14) = 2.2535$  | 0.1471   |
| <b>Caspase-3</b>              | rd1 (11)<br>$R^2_{adj.} = .04$<br>n = 58           | Treatment                  | Yes                    | Yes               | $F(2, 7.15) = 0.3799$   | 0.6970   |
| <b>ONL localisation TUNEL</b> | rd1 (9)<br>$R^2_{adj.} = .72$<br>n = 53            | Treatment                  | Yes                    | No                | $F(2, 10.11) = 49.4033$ | <0.0001  |

Treatment: (D-cis-diltiazem, L-cis-diltiazem), <sup>1</sup>(0, 25, 50, 100  $\mu$ M), <sup>2</sup>(0, 25  $\mu$ M), <sup>3</sup>(0, 50  $\mu$ M), <sup>4</sup>(0, 100  $\mu$ M)

102

103 **Table S7: Analysis of cell death markers using linear mixed-effects models.** Shown  
 104 are the effects that explain the variability of the dependent variables TUNEL, calpain  
 105 activity, calpain-2 positive cells, as well as localization of TUNEL positive cells within the  
 106 ONL. All models included the animal as a random effect to account for repeated  
 107 measures. Numbers in brackets indicate the total number of animals used per genotype,  
 108 n represents the number of observations used in the model. Normality of residuals was  
 109 assessed visually; heterogeneity of residual variances (homoscedasticity) was tested  
 110 with the Brown-Forsythe test. Linear mixed-effects models have been shown to be robust  
 111 against violations of model assumptions (81).

112

113

114 **Supplementary Table S8**

|                                                | <b>Contrast<br/>LS means</b><br>[95% confidence interval] (%) |                                                            | <b>LS means</b><br>diff. $\pm$ SE (%) | <b>F-statistic</b>     | <b>p-value</b> |
|------------------------------------------------|---------------------------------------------------------------|------------------------------------------------------------|---------------------------------------|------------------------|----------------|
| <b>ONL<br/>localisation<br/>TUNEL</b>          | <i>rd1</i> ctrl<br>59.98<br>[54.04, 65.92]                    | <i>rd1</i> D-25 $\mu$ M<br>57.44<br>[52.05, 62.83]         | 2.54 $\pm$ 3.79                       | F(1, 16.33) = 0.4511   | 0.5112         |
|                                                |                                                               | <i>rd1</i> L-25 $\mu$ M<br>85.03<br>[79.70, 90.36]         | 25.05 $\pm$ 3.40                      | F(1, 10.42) = 54.2025  | < 0.0001       |
| <b>Calpain<br/>activity</b>                    | ctrl<br>2.41 [1.83, 3.00]                                     | L-50 $\mu$ M<br>6.42 [5.67, 7.17]                          | 4.01 $\pm$ 0.47                       | F(1, 45) = 71.9711     | <0.0001        |
| <b>Calpain-2</b>                               | <i>rd1</i> ctrl<br>1.82<br>[1.20, 2.44]                       | <i>rd1</i> D-50 $\mu$ M<br>0.68<br>[0.07, 1.30]            | 1.13 $\pm$ 0.40                       | F(1, 12.52) = 7.9008   | 0.0152         |
|                                                |                                                               | <i>rd1</i> L-50 $\mu$ M<br>2.73<br>[2.11, 3.35]            | 0.91 $\pm$ 0.40                       | F(1, 12.69) = 5.0979   | 0.0423         |
|                                                | wt ctrl<br>0.52<br>[0.09, 1.13]                               | wt L-50 $\mu$ M<br>2.04<br>[1.43, 2.66]                    | 1.52 $\pm$ 0.39                       | F(1, 11.87) = 14.7372  | 0.0024         |
| <b>TUNEL</b>                                   | <i>rd1</i> ctrl<br>98.10<br>[50.88, 145.32]                   | <i>rd1</i> D-100 $\mu$ M<br>180.85<br>[111.06, 250.63]     | 82.75 $\pm$ 41.14                     | F(1, 28.11) = 4.0454   | 0.0540         |
|                                                | <i>rd1</i> ctrl<br>101.96<br>[54.54, 149.38]                  | <i>rd1</i> L-100 $\mu$ M<br>661.96<br>[593.66, 730.26]     | 560.00 $\pm$ 40.99                    | F(1, 26.68) = 191.1994 | <0.0001        |
|                                                | <i>rd10</i> ctrl<br>90.68<br>[201.44, 382.81]                 | <i>rd10</i> D-100 $\mu$ M<br>401.33<br>[111.58, 691.07]    | 310.60 $\pm$ 178.75                   | F(1, 8.10) = 3.0200    | 0.1200         |
|                                                | <i>rd10</i> ctrl<br>93.60<br>[198.61, 385.80]                 | <i>rd10</i> L-100 $\mu$ M<br>1403.14<br>[1060.80, 1745.48] | 1310.00 $\pm$ 199.71                  | F(1, 9.25) = 42.9966   | <0.0001        |
|                                                | wt ctrl<br>105.35<br>[58.38, 152.32]                          | wt D-100 $\mu$ M<br>112.44<br>[43.49, 181.39]              | 7.10 $\pm$ 39.87                      | F(1, 19.17) = 0.0316   | 0.8607         |
|                                                | wt ctrl<br>98.28<br>[51.36, 145.21]                           | wt L-50 $\mu$ M<br>458.14<br>[406.36, 509.93]              | 359.90 $\pm$ 33.31                    | F(1, 18.59) = 116.6931 | <0.0001        |
| wt L-100 $\mu$ M<br>420.42<br>[366.06, 474.78] |                                                               | 322.10 $\pm$ 34.59                                         | F(1, 21.63) = 86.7207                 | <0.0001                |                |

115

116 **Table S8: Post-hoc analysis of the linear mixed-effects models.** Results of contrast  
117 tests comparing the least-square means, which resulted from the linear mixed-effects  
118 models shown in Table S7.

81. Schielzeth H, Dingemans NJ, Nakagawa S, Westneat DF, Allogue H, Teplitsky C, et al. Robustness of linear mixed-effects models to violations of distributional assumptions. *Methods Ecol Evol.* 2020;11:1141–52.
